# Supplementary material for: Copper doped ceria porous nanostructures towards a highly efficient bifunctional catalyst for carbon monoxide and nitric oxide elimination
Source: PubMed Central journal article supplement (PMC5489022; doi:10.1039/c5sc00129c), 2015-02-10
Supplement: SC-006-C5SC00129C-s001.pdf [file SC-006-C5SC00129C-s001.pdf]

# **Copper Doped Ceria Porous Nanostructures towards Highly Efficient Bifunctional Catalyst for Carbon Monoxide and Nitric Oxides Elimination**

Shanlong Li, Nengli Wang, Yonghai Yue, Guang-sheng Wang, Zhao Zu and Yu Zhang

## Experimental Section

**Materials.** The initial chemicals, including  $\text{Ce}(\text{NO}_3)_3 \cdot 6\text{H}_2\text{O}$  (Alfa Aescar Chemical Co.),  $\text{Cu}(\text{NO}_3)_2 \cdot 3\text{H}_2\text{O}$  (Alfa Aescar Chemical Co.), benzene-1,3,5-tricarboxylic acid (BTC) (98%, Alfa Aescar Chemical Co.), terephthalic acid (BDC) (98%, Alfa Aescar Chemical Co.) 4,4'-Biphenyldicarboxylic acid (BPDC) (98%, Alfa Aescar Chemical Co.) and ethanol (A. R., Beijing Fine Chemical Company, China), were used without further purification.

### Preparation.

**CeO<sub>2</sub> nanorods:** In a typical procedure, the reaction of  $\text{Ce}(\text{NO}_3)_3 \cdot 6\text{H}_2\text{O}$  (1 mmol) and BTC (1 mmol) in a 1:1 stoichiometry in ethanol-water solution (50 mL, v/v = 1:1) was carried out under vigorous stirring at room temperature. The reaction mixture was then refluxed at 90 °C under constant stirring for 2 h, and a large amount of white precipitate occurred. At last, the precipitate was collected by centrifugation, washed several times with ethanol and water, and dried at 60 °C for 24 h in atmosphere. In addition, the conversion of  $\text{Ce}(\text{BTC}) \cdot 6\text{H}_2\text{O}$  into  $\text{CeO}_2$  was carried out in an oven at 600 °C for 3 h in air.

**CeO<sub>2</sub> nanobundles:** the procedure for the synthesis of  $\text{CeO}_2$  nanobundles is similar with the procedure for the synthesis of  $\text{CeO}_2$  nanorods. The only different is reducing the concentrations of reactant (1 mL of 0.5 M  $\text{Ce}(\text{NO}_3)_3$  aqueous solution was added into BTC (0.5 mmol) water-ethanol solution (40 mL, v/v = 1:1)).

**Cu<sup>2+</sup>-doped CeO<sub>2</sub> nanorods and nanobundles:** Cu<sup>2+</sup>-doped  $\text{CeO}_2$  nanorods and nanobundles were prepared by the same treatment as the undoped sample except that 0.1 mmol  $\text{Cu}(\text{NO}_3)_2 \cdot 3\text{H}_2\text{O}$  and 0.9 mmol  $\text{Ce}(\text{NO}_3)_3 \cdot 6\text{H}_2\text{O}$  were used instead of 1 mmol  $\text{Ce}(\text{NO}_3)_3 \cdot 6\text{H}_2\text{O}$ .

The procedure for the synthesis of other Cu<sup>2+</sup>-doped  $\text{CeO}_2$  nanostructures obtain from Ce(Cu)-BDC and Ce(Cu)-BPDC is similar with the procedure for the synthesis of Cu<sup>2+</sup>-doped  $\text{CeO}_2$  nanorods.

### Characterization.

Powder X-ray diffraction (XRD) patterns were performed on a D8 Focus (Bruker) diffractometer (continuous, 40 kV, 40 mA, increment: 0.02 degree). Thermogravimetric analysis and differential thermal analysis (TGADTA) data were recorded with a thermal analysis instrument (SDT2960, TA Instruments, New Castle, DE) at the heating rate of 10 °C min<sup>-1</sup> in an air flow of 100 mL min<sup>-1</sup>. The morphology and composition of the samples were inspected using a field emission scanning electron microscope (FE-SEM, S-4800, Hitachi) equipped with an energy dispersive X-ray spectrum (EDX, JEOL JXA-840). Transmission electron microscopy (TEM) images were obtained using a JEOL 2010 transmission electron microscope operating at 200 kV. The X-ray diffraction patterns of the products were collected on a Rigaku-D/max 2500 V X-ray diffractometer with Cu-K $\alpha$  radiation ( $\lambda = 1.5418 \text{ \AA}$ ), with an operation voltage and current maintained at 40 kV and 40 mA. Transmission electron microscopic (TEM) images were obtained with a TECNAI G2 high-resolution transmission electron microscope operating at 200 kV. XPS measurement was performed on an ESCALAB-MKII 250 photoelectron spectrometer (VG Co.) with Al K $\alpha$  X-ray radiation as the X-ray source for excitation.

**Catalytic test:** 8 mg catalyst was mixed with 20 mg SiO<sub>2</sub>. The mixture was put in a stainless steel reaction tube. The experiment was carried out under a flow of reactant gas mixture (1 % CO, 20 % O<sub>2</sub>, balance N<sub>2</sub>) at a rate of 30 mL/min. The composition of the gas was monitored on-line by gas chromatography (GC 9800).

Micromeritics ASAP2020 surface area analyzer was used to measure gas adsorption.

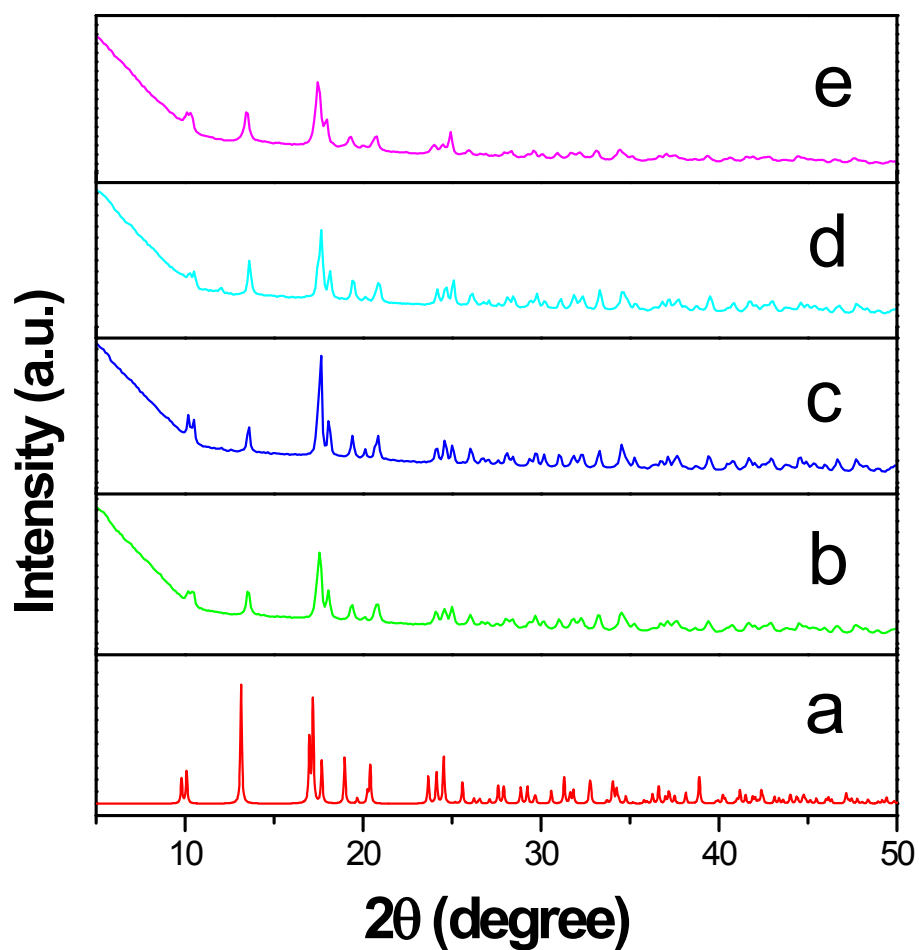

Fig. S1. The XRD patterns of  $\text{Ce}(\text{BTC})(\text{H}_2\text{O})_6$  and  $\text{Cu}^{2+}$  doped (10% content with Ce)  $\text{Ce}(\text{BTC})(\text{H}_2\text{O})_6$  nanocrystals (a: simulated  $\text{Ce}(\text{BTC})(\text{H}_2\text{O})_6$ ; b:  $\text{Ce}(\text{BTC})(\text{H}_2\text{O})_6$  nanorods; c:  $\text{Ce}(\text{BTC})(\text{H}_2\text{O})_6$  nanobundles; d:  $\text{CeCu}(\text{BTC})(\text{H}_2\text{O})_6$  nanorods; e:  $\text{CeCu}(\text{BTC})(\text{H}_2\text{O})_6$  nanobundles).

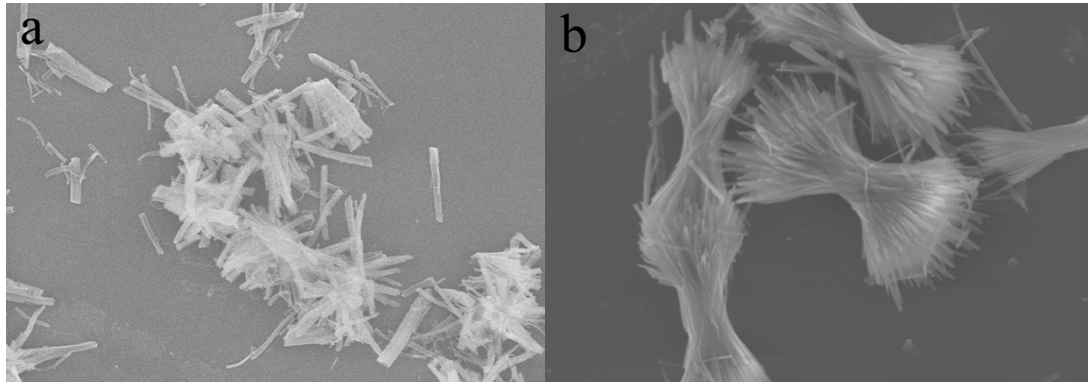

Fig. S2. The morphology of Ce-MOF nanorods (a) and nanobundles (b).

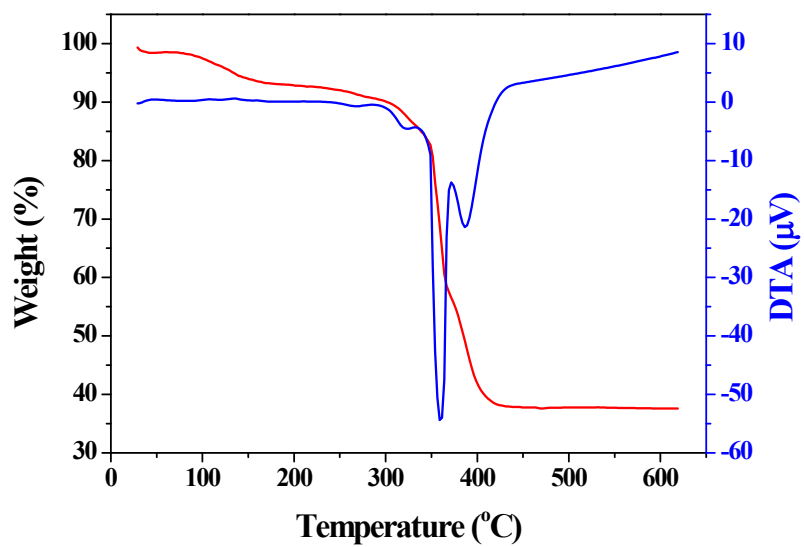

Fig. S3. TG-DTA analysis of CeCu-BTC nanocrystals.

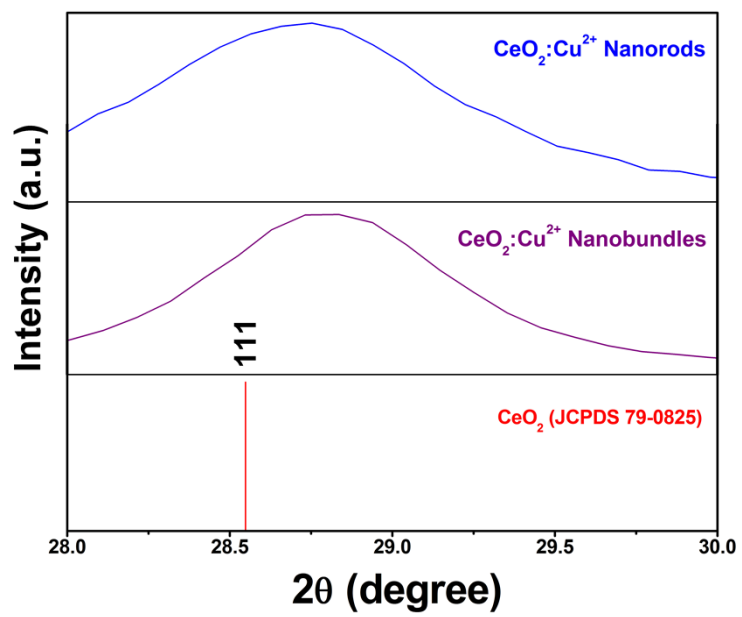

Fig. S4. XRD patterns of Cu<sup>2+</sup> doped samples.

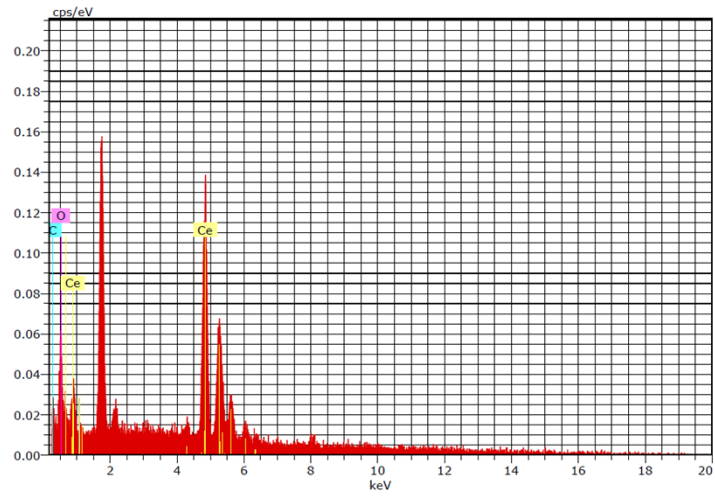

Fig. S5. The representative EDX patterns recorded from the  $\text{CeO}_2:\text{Cu}^{2+}$ .

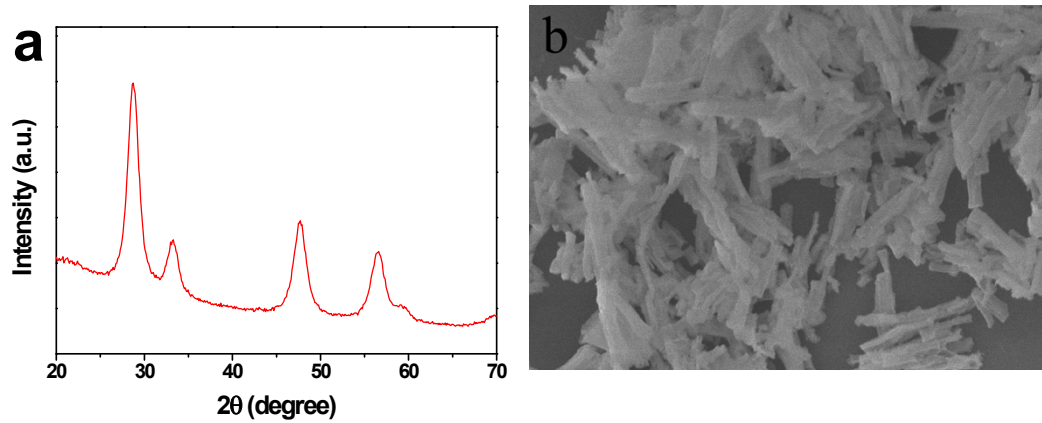

Fig. S6. The XRD pattern (a) and SEM image (b) of the nanorods after catalytic reaction.



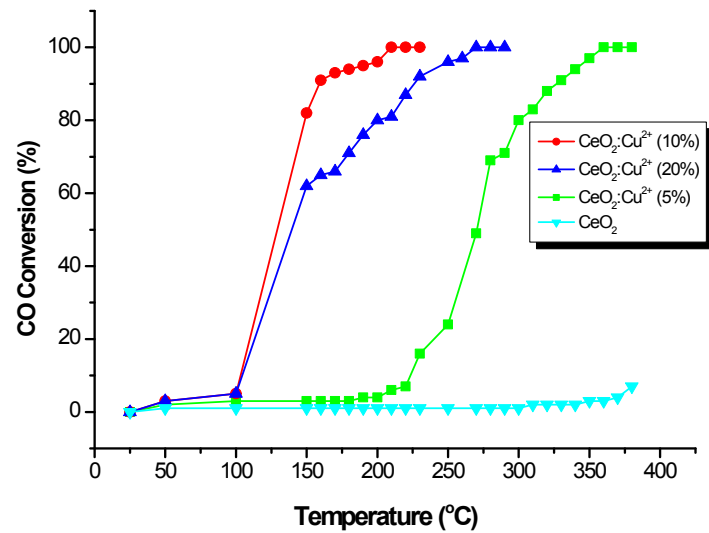

Fig. S7. The CO catalytic activity of CeO<sub>2</sub>:Cu<sup>2+</sup> porous nanomaterials with different Cu<sup>2+</sup> content.

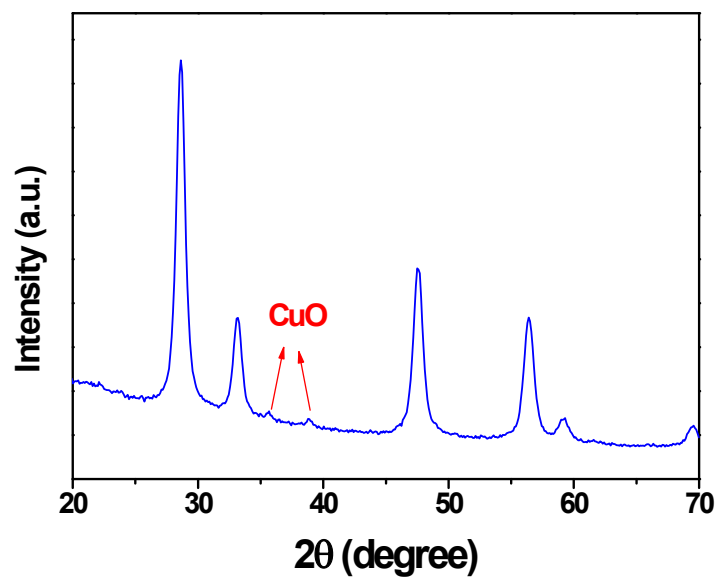

Fig. S8. The XRD pattern of  $\text{CeO}_2:\text{Cu}^{2+}$  nanocrystals with 20%  $\text{Cu}^{2+}$  content.

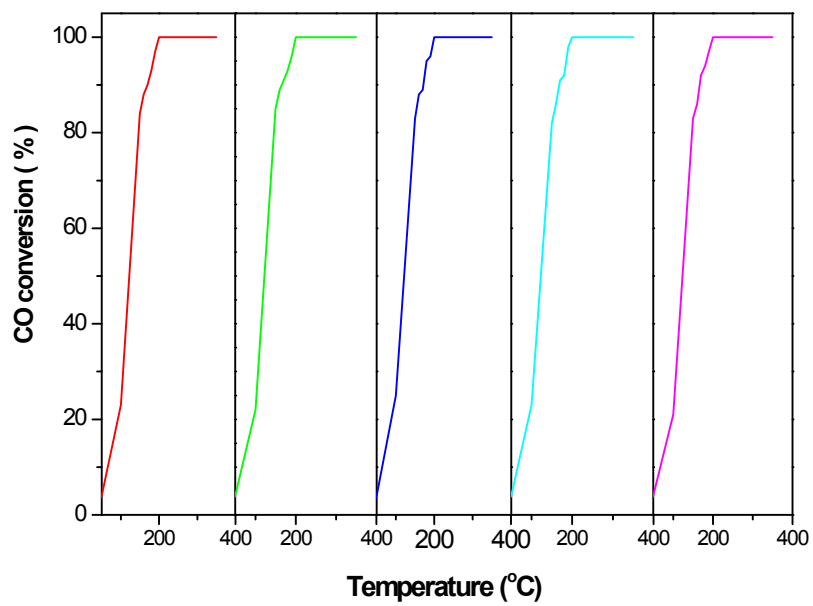

Fig. S9. Catalytic cycles of CeO<sub>2</sub>:Cu<sup>2+</sup> nanorods.

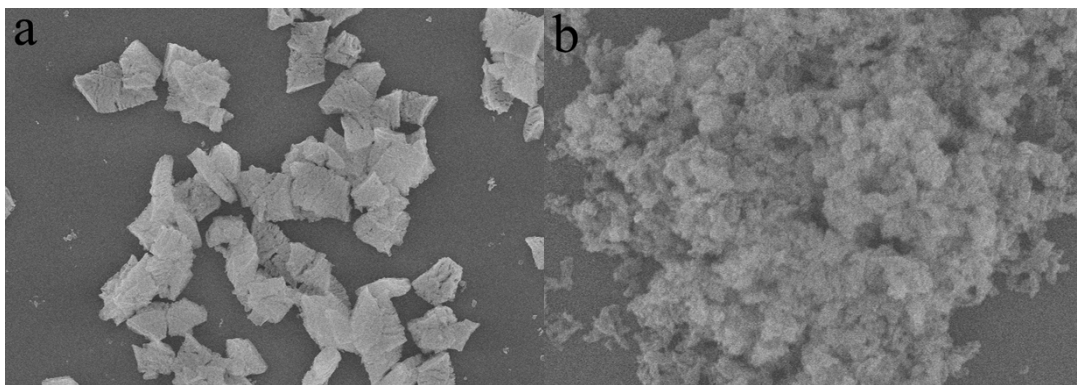

Fig. S10. The morphology of  $\text{CeO}_2:\text{Cu}^{2+}$  nanocrystals obtained from CeCu-BDC (a) and CeCu-BPDC (b).
